# Supplementary material for: Diclofenac-Derived Hybrids for Treatment of Actinic Keratosis and Squamous Cell Carcinoma
Source: PubMed Central journal article supplement (PMC6539072; doi:10.3390/molecules24091793), 2019-05-09

## Supporting information

### 1. NMR spectra

#### $^1\text{H}$ NMR of **1**

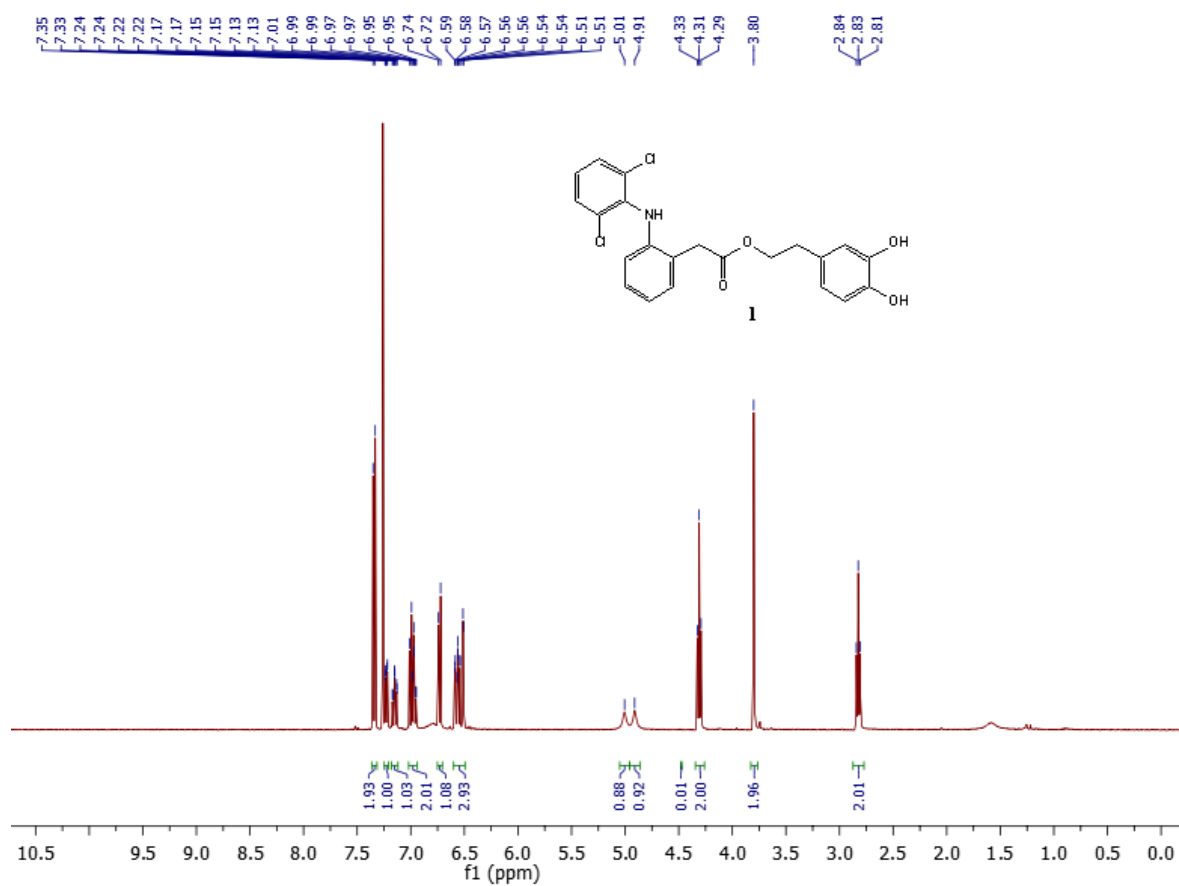

# $^{13}\text{C}$ NMR of **1**

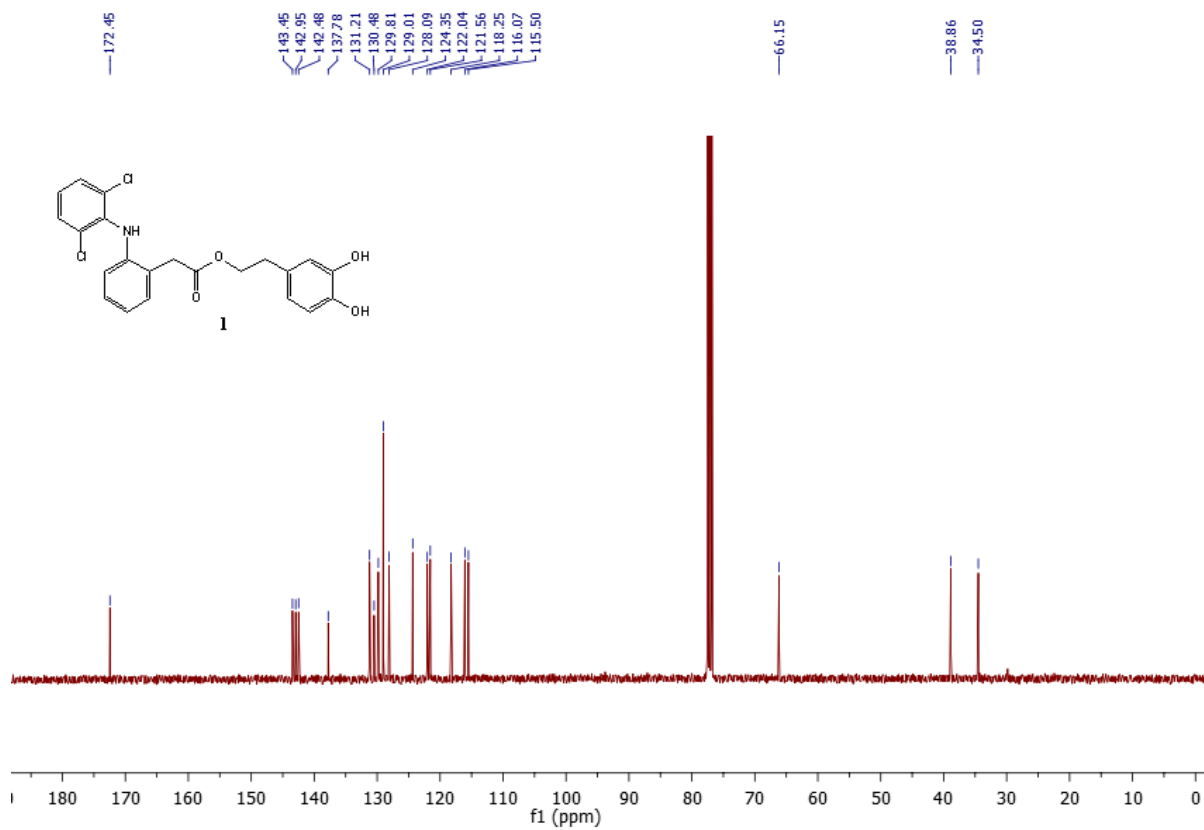

<sup>1</sup>H NMR of 2

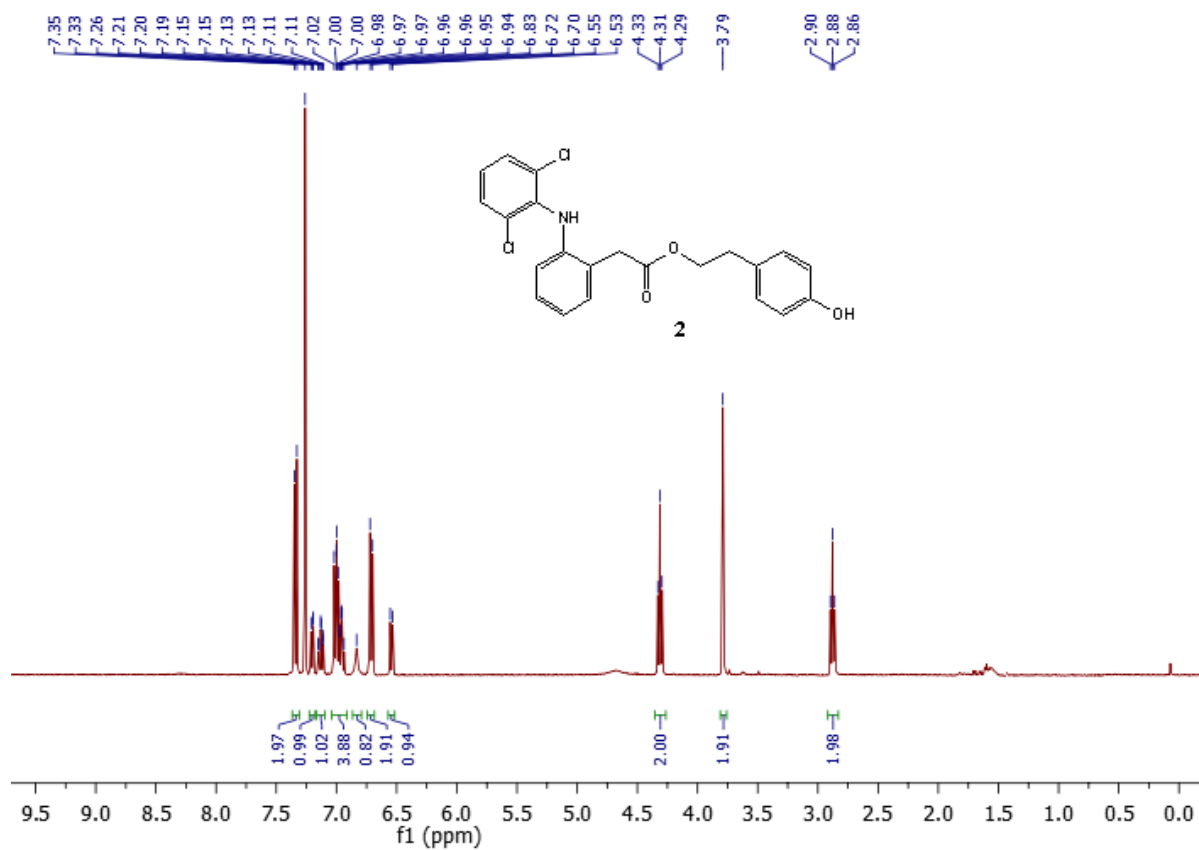

# $^{13}\text{C}$ NMR of **2**

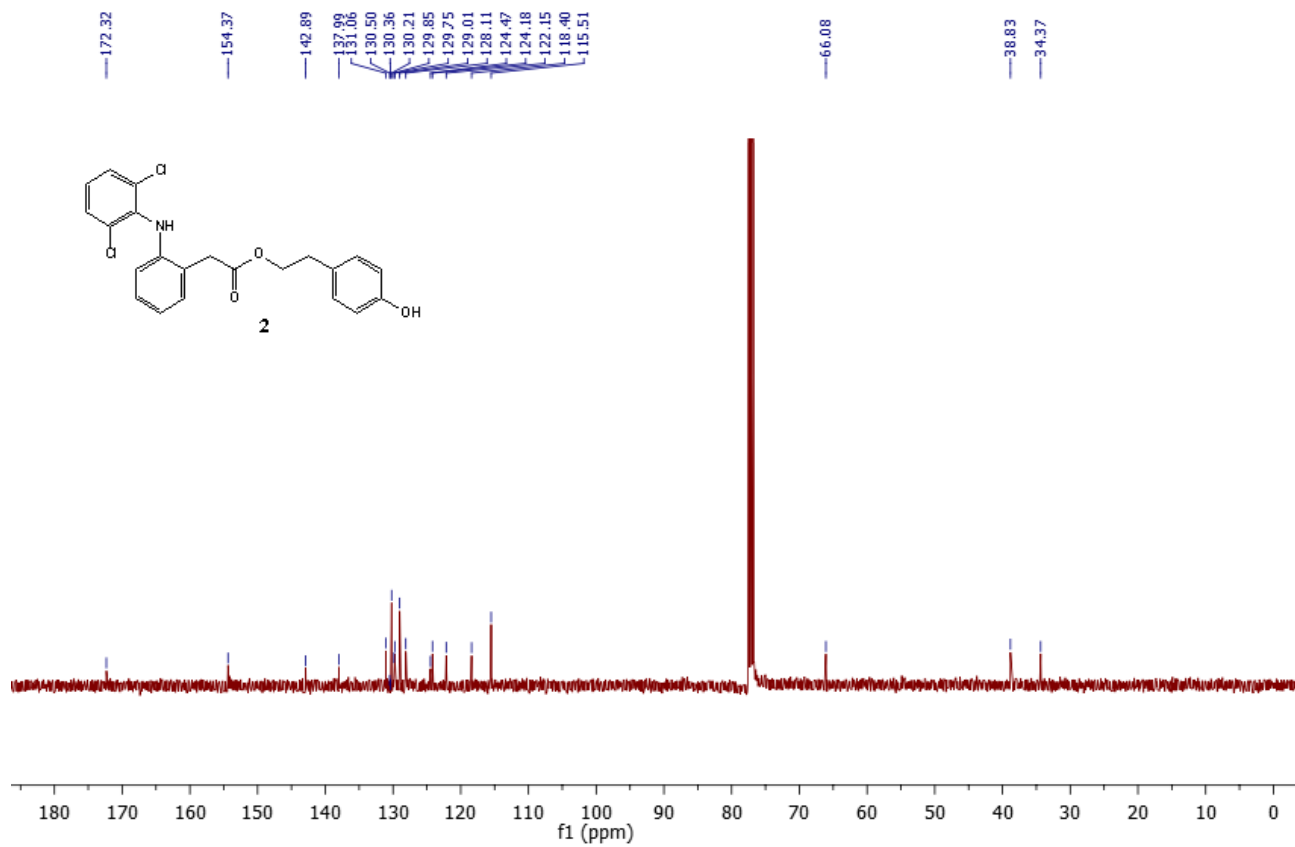

<sup>1</sup>H NMR of 3

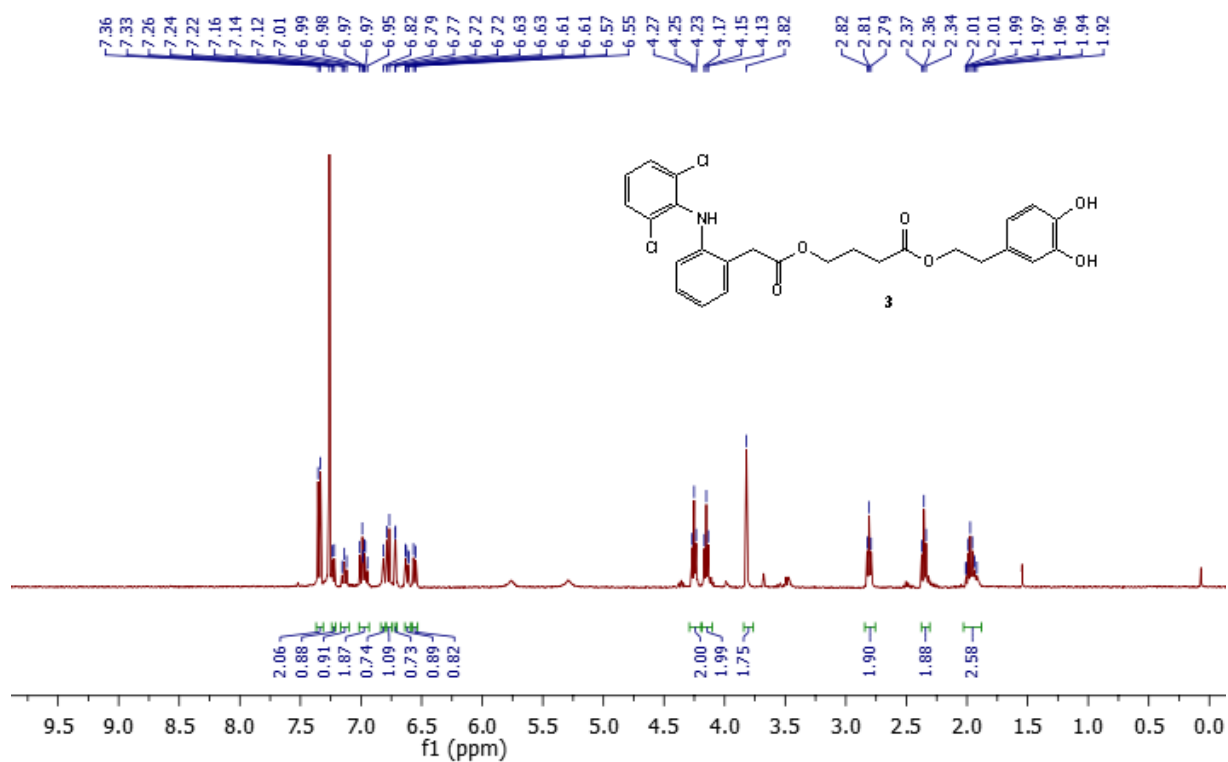

### <sup>13</sup>C NMR of 3

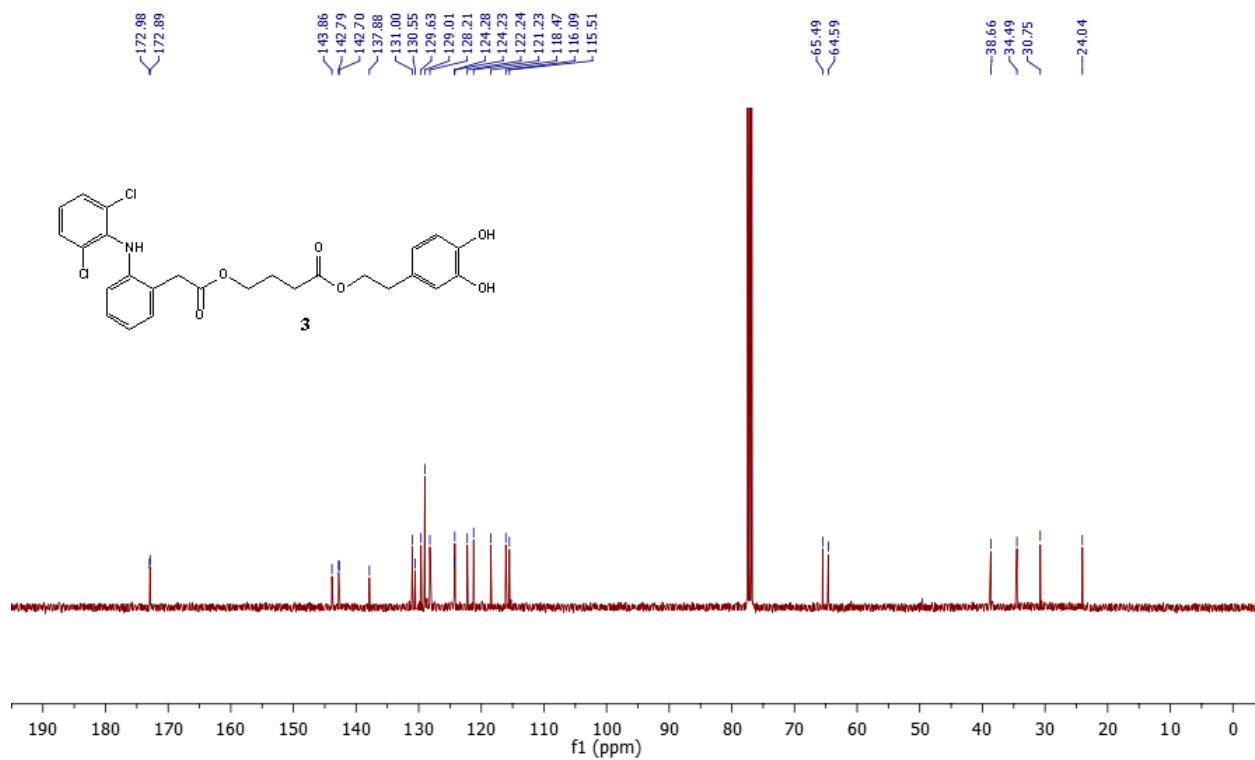

# <sup>1</sup>H NMR of 4

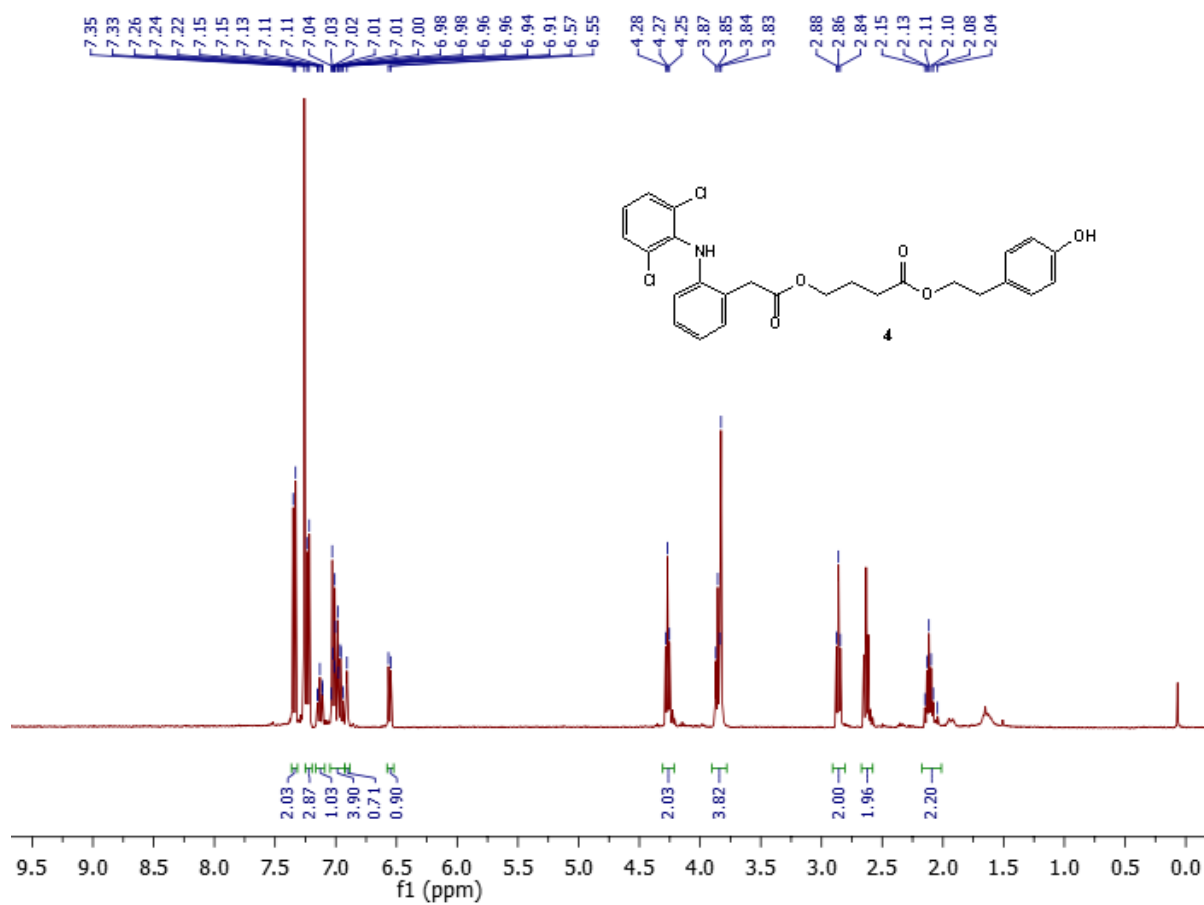

# $^{13}\text{C}$ NMR of 4

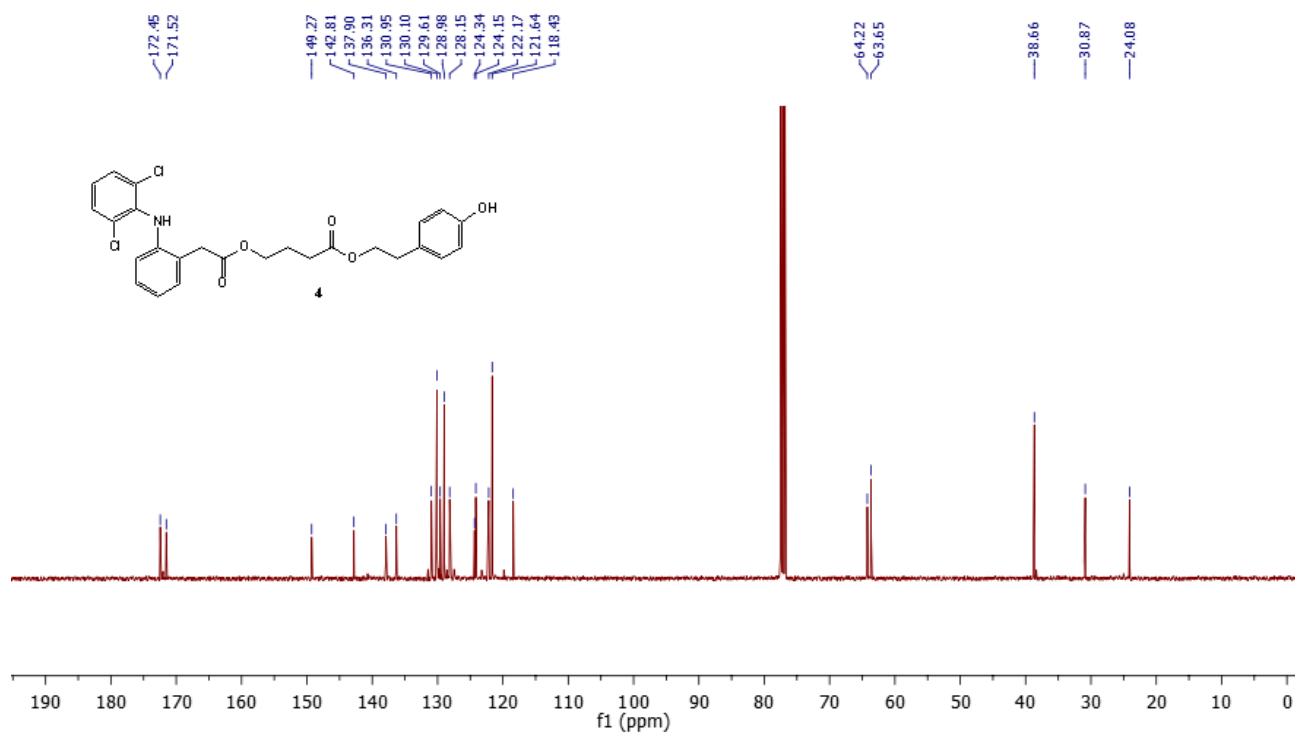

Supplement: molecules-24-01793-s001.pdf [file molecules-24-01793-s001.pdf]
